# Supplementary material
Source: HighWire-hosted journal article supplement (http://jmg.bmjjournals.com/highwire/filestream/160639/field_highwire_adjunct_files/0/Supplemental_Data.pdf)

## Supplemental Data 1. Pathogenicity grades

|                                                                                              | Pathogenic     | UV4 | UV3     | UV2     | UV1            | Neutral        |
|----------------------------------------------------------------------------------------------|----------------|-----|---------|---------|----------------|----------------|
| Frequency in ethnically matching controls (N=876 chromosomes) $\leq 0.236\%$                 | yes            | yes | yes     | yes*    | unknown        | no             |
| <i>In trans</i> with a 'Pathogenic' or 'UV4' mutation                                        | yes            | yes | unknown | unknown | unknown        | no             |
| Segregates with disease in >2 NCUS families or previously published as 'Pathogenic' or 'UV4' | yes            | no  | no      | no      | no             | no             |
| Novel, segregates with disease in only one NCUS family                                       | Not applicable | yes | yes     | yes     | no             | no             |
| Identified in proband with one or two other mutations with a higher pathogenicity grade      | no             | no  | no      | no      | yes or unknown | yes or unknown |

\*Genotyped in 96 CEPH control chromosomes

## Supplemental Data 2. USH1C:c.496+1G>A assay

The following primers were used: forward 5'-TAGGGGACGAGATCGTCCGGATCA-3' and reverse (introduced mutation is underlined): 5'-

TGGAGTACTGCCCTGCTCTGGCCTCACACA-3'. The reverse primer was designed in order to create an artificial restriction site in c.496+1G>A mutant sequence, but not the wild type, using the web-based program dCAPS Finder v2.[21] For each PCR reaction 1ng/μl genomic DNA was amplified with 0.5pmol/μl of each primer, 1M betaine (Sigma-Aldrich), 0.25mM dNTPs (Microzone Ltd), 1x buffer, 1.5mM MgCl<sub>2</sub> and 0.5% BIOTAQ™ DNA polymerase (all Biorline). The PCR program consisted of a denaturation step of 10 min at 95°C, followed by 37 cycles of 30 sec at 95°C, 30 sec at 61°C, 40 sec at 72°C and a final extension at 72°C for 10 min. Restriction digests were prepared using *PciI* (New England Biolabs) according to manufacturer's instructions. The digested product was run on 4% agarose gel.

Supplemental Data 3.

a) Relative proportions of molecular subtypes in Usher Type 1

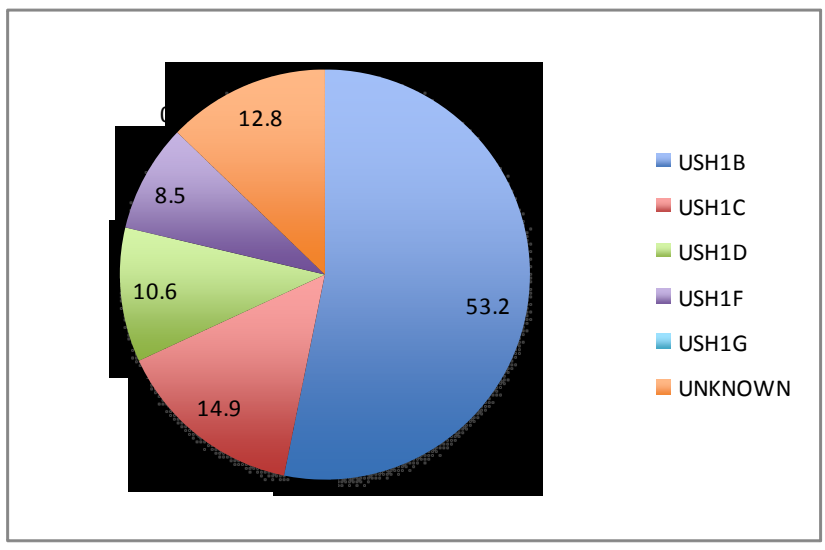

b) Relative proportions of molecular subtypes in Usher Type 2

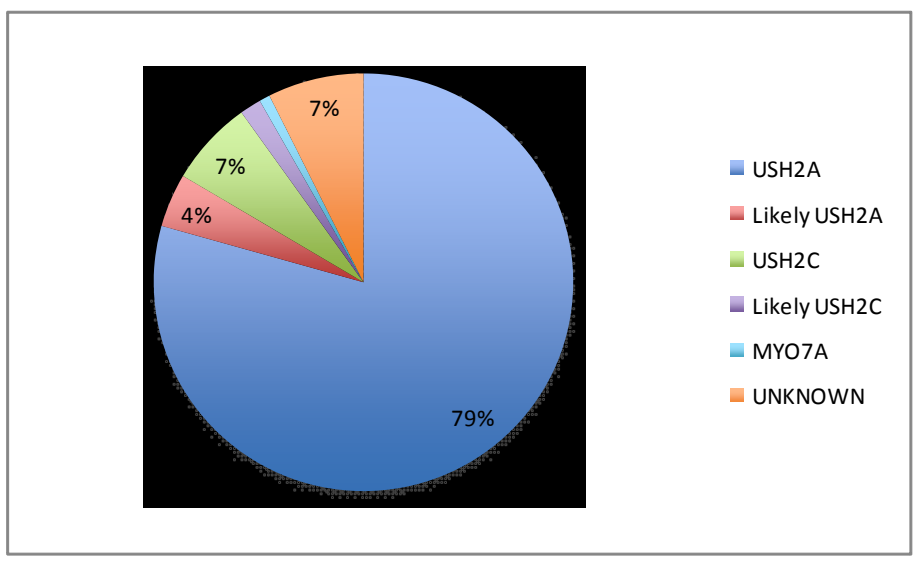

Supplement: Supplemental_Data.pdf [file Supplemental_Data.pdf]
